# Supplementary material for: Ultrafast breathing humidity sensing properties of low-dimensional Fe-doped SnO2flower-like spheres
Source: Royal Society of Chemistry journal article supplement (doi:10.1039/c5ra27572e), 2016-01-01
Supplement: c5ra27572e1.pdf [file c5ra27572e1.pdf]

# Ultrafast breathing humidity sensing property of the low-dimensional Fe-doped $\text{SnO}_2$ flower-like spheres

Yuhua Zhen,<sup>†\*a,b</sup> Fu-Hua Sun,<sup>†c</sup> Min Zhang,<sup>a</sup> Kaili Jia,<sup>a</sup> Linling Li<sup>a</sup> and Qingzhong  
Xue<sup>a</sup>

[zhenyh@upc.edu.cn](mailto:zhenyh@upc.edu.cn)

## 1. Fabrication of humidity sensors

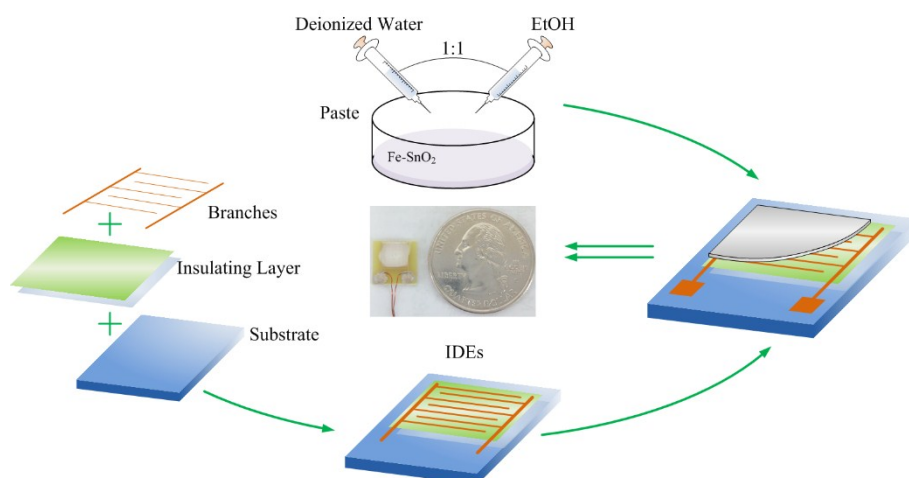

Scheme S1. The fabrication route of  $\text{SnO}_2$  flower-like nanosphere humidity sensors.

## 2. FESEM image

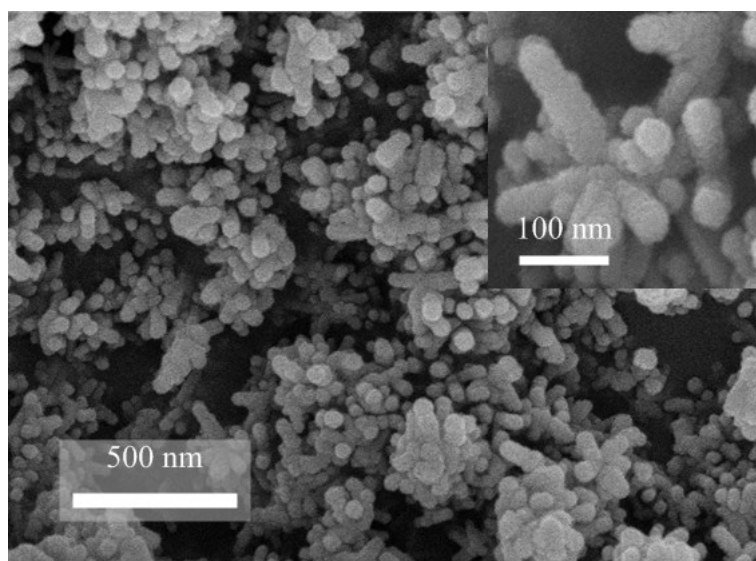

Fig. S1. FESEM image of 5% Fe-doped  $\text{SnO}_2$  hierarchical nanostructure.

## 3. EDX pattern

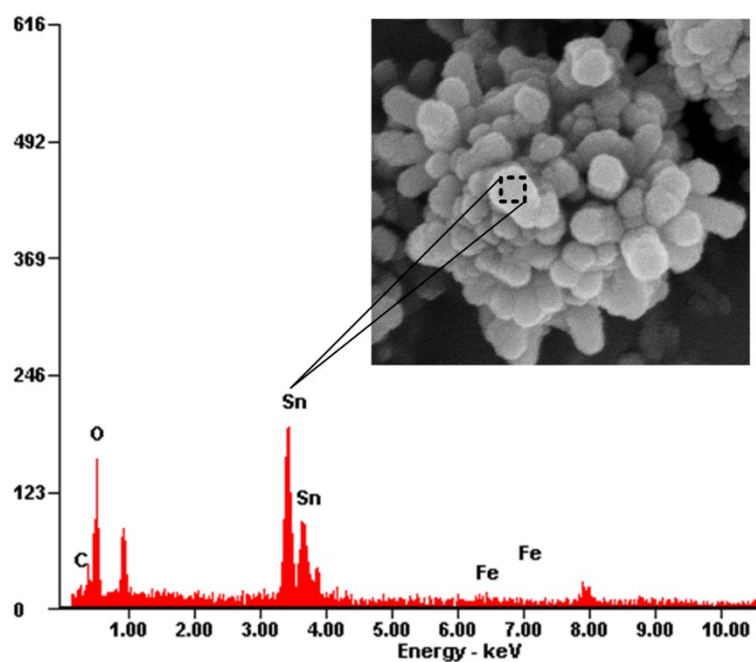

Fig. S2. EDX pattern of the branch (nanorod) of 2% Fe-doped  $\text{SnO}_2$  flower-like nanosphere.

#### 4. TG curves

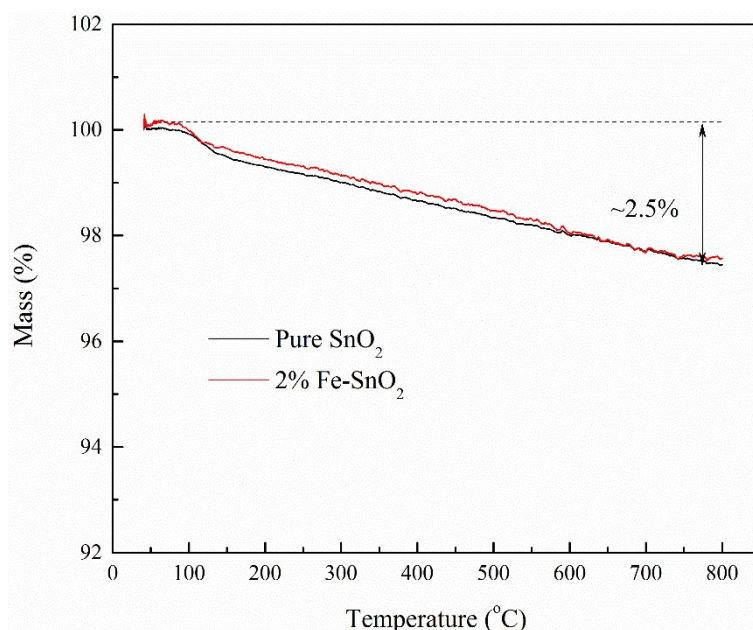

Fig. S3. TG curves of pure and 2% Fe-doped SnO<sub>2</sub> samples.

According to the TG curves, weight loss in the range of 40 – 300 °C (~1%) could be attributed to desorption of water. On the basis of the total weight loss of samples, the mass loss ratio is about 1.5% at the whole testing temperature (40 – 800 °C), which is represented the SnO<sub>2</sub> thermal stable nanostructures.

#### 5. Response/recovery curves

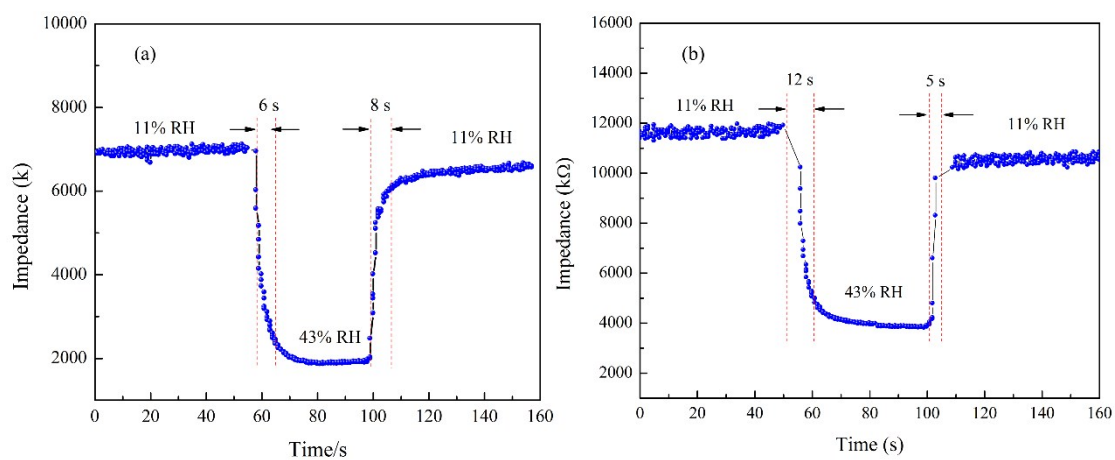

Fig. S4. Response/recovery curves of the (a) pure and (b) 2% Fe-doped SnO<sub>2</sub> film sensors at 43% RH.

## 6. Complex impedance plots

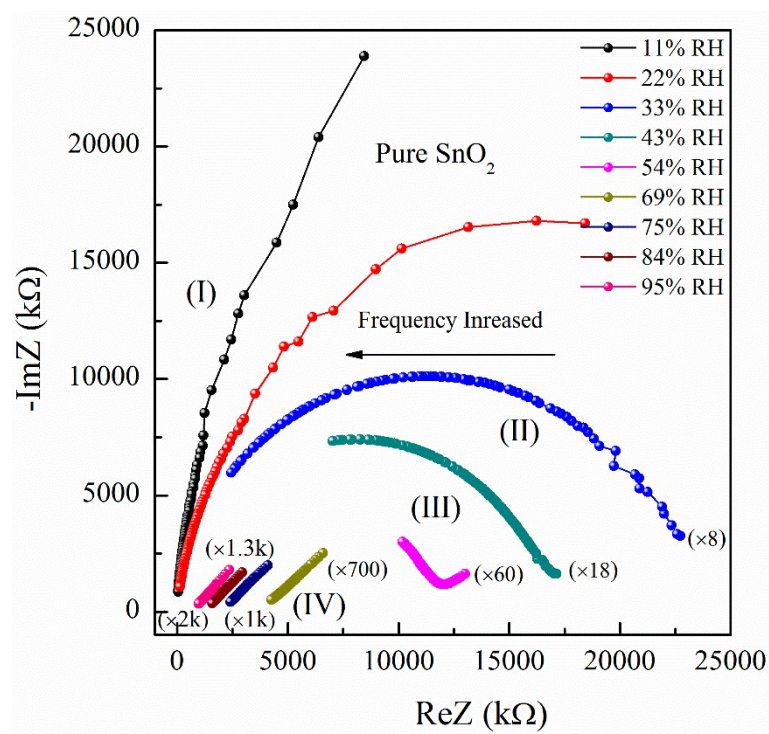

Fig. S5. The complex impedance plots of pure  $\text{SnO}_2$  flower-like nanospheres sensors at various RHs.
